# Supplementary material for: Genetic and phenotypic variations of inherited retinal diseases in dogs: the power of within- and across-breed studies
Source: Springer Nature journal article supplement (doi:10.1007/s00335-011-9361-3), 2011-11-07
Supplement: MOESM1 [file 335_2011_9361_MOESM1_ESM.pdf]

**Supplementary Fig. 1** Genetic diversity of AKC breeds affected with of  $cd^{AMAL}$ ,  $cea$ , and  $cmr1$  shown in a neighbor-joining tree of domestic dogs and gray wolves (reprinted and modified with permission from Vonholdt et al. 2010). The names of breeds that were included in the study by Vonholdt et al. (2010) are outlined. For other breeds, images are placed at a hypothetical position based on breed history and previously reported structural analysis of canine breeds (Parker et al. 2004). Dog images are from Wikipedia (<http://en.wikipedia.org/>) and not to scale (PDF 430 kb)

## References

Parker HG, Kim LV, Sutter NB, Carlson S, Lorentzen TD, Malek TB, Johnson GS, DeFrance HB, Ostrander EA, Kruglyak L (2004) Genetic structure of the purebred domestic dog. *Science* 304:1160–1164

Vonholdt BM, Pollinger JP, Lohmueller KE, Han E, Parker HG, Quignon P, Degenhardt JD, Boyko AR, Earl DA, Auton A, Reynolds A, Bryc K, Brisbin A, Knowles JC, Mosher DS, Spady TC, Elkahloun A, Geffen E, Pilot M, Jedrzejewski W, Greco C, Randi E, Bannasch D, Wilton A, Shearman J, Musiani M, Cargill M, Jones PG, Qian Z, Huang W, Ding ZL, Zhang YP, Bustamante CD, Ostrander EA, Novembre J, Wayne RK (2010) Genome-wide SNP and haplotype analyses reveal a rich history underlying dog domestication. *Nature* 464:898–902

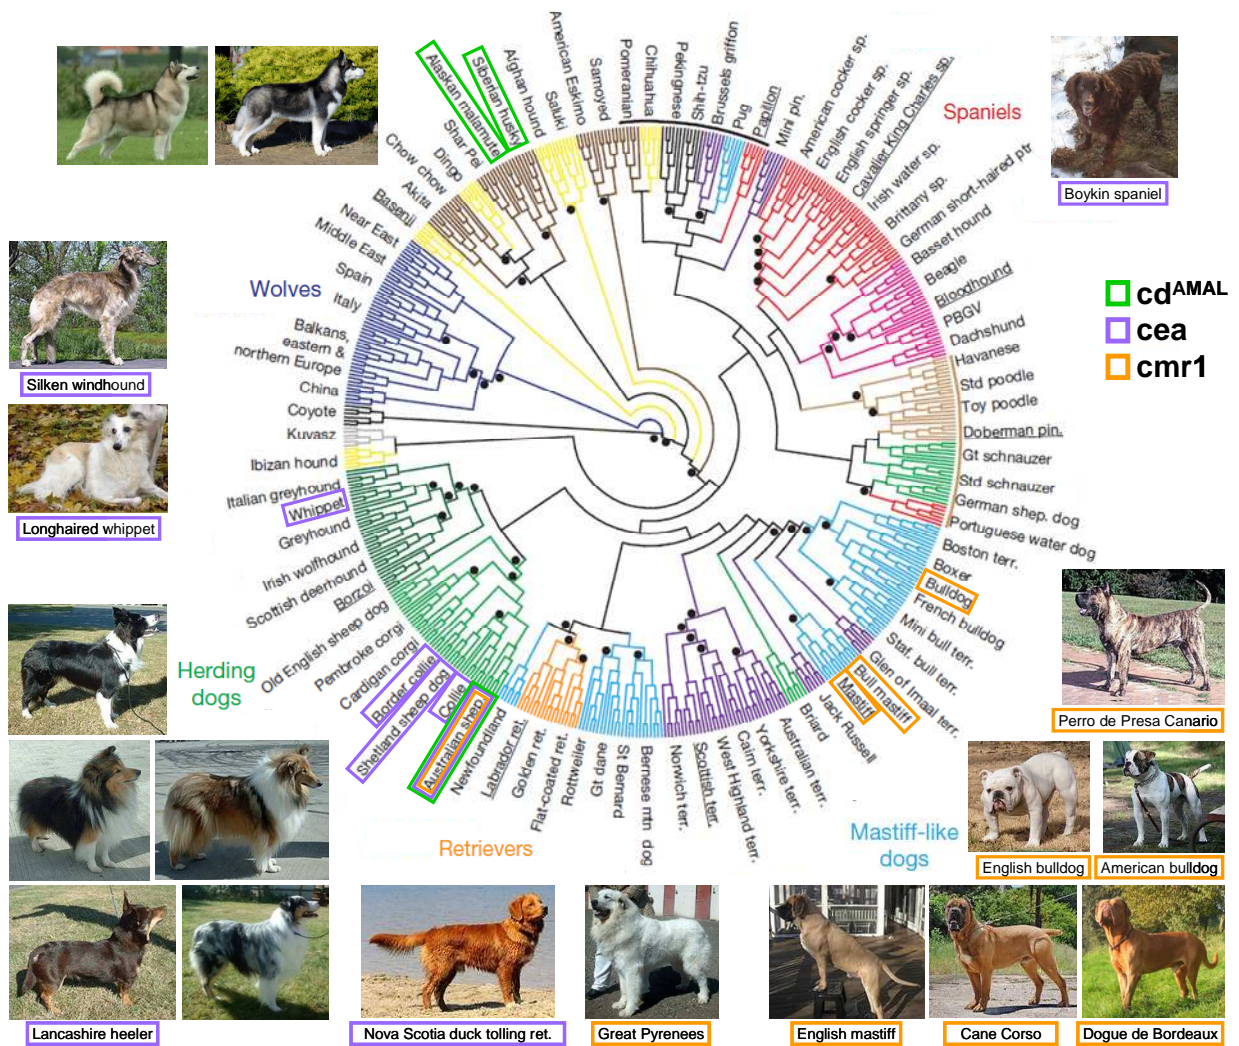

Supplementary Figure 1

## Supplementary Table 1. Genes associated with human retinal diseases

Genes that have been associated with each diverse form of inherited retinal diseases in man. Those genes also found in canine retinal diseases are outlined if the mutation results in the same disease category, and underlined if otherwise. Modified and reprinted from RetNet, <http://www.sph.uth.tmc.edu/RetNet>, with permission (Stephen P. Daiger, PhD, and the Univ. of Texas Health Science Center at Houston)."

| Disease Category                                 | Defective Genes                                                                                                                                                                                                                                                                                                                                                                                                                                                                                                                                            |
|--------------------------------------------------|------------------------------------------------------------------------------------------------------------------------------------------------------------------------------------------------------------------------------------------------------------------------------------------------------------------------------------------------------------------------------------------------------------------------------------------------------------------------------------------------------------------------------------------------------------|
| Bardet-Biedl syndrome, AR                        | <i>ARL6</i> , <i>BBS1</i> , <i>BBS2</i> , <i>BBS4</i> , <i>BBS5</i> , <i>BBS7</i> , <i>BBS9</i> , <i>BBS10</i> , <i>BBS12</i> , <i>CEP290</i> , <i>INPP5E</i> , <i>MKKS</i> , <i>MKS1</i> , <i>TRIM32</i> , <i>TTC8</i>                                                                                                                                                                                                                                                                                                                                    |
| Chorioretinal atrophy or degeneration, AD        | <i>RGR</i> , <i>TEAD1</i>                                                                                                                                                                                                                                                                                                                                                                                                                                                                                                                                  |
| Cone or cone-rod dystrophy, AD                   | <i>AIPL1</i> , <i>CRX</i> , <i>GUCA1A</i> , <i>GUCY2D</i> , <i>PITPNM3</i> , <i>PROM1</i> , <i>PRPH2</i> , <i>RIMS1</i> , <i>SEMA4A</i> , <i>UNC119</i>                                                                                                                                                                                                                                                                                                                                                                                                    |
| Cone or cone-rod dystrophy, AR                   | <i>ABCA4</i> , <u><i>ADAM9</i></u> , <i>CACNA2D4</i> , <i>CDHR1</i> , <i>CERKL</i> , <u><i>CNGB3</i></u> , <i>KCNV2</i> , <i>PDE6C</i> , <i>RAX2</i> , <i>RDH5</i> , <u><i>RPGRIP1</i></u>                                                                                                                                                                                                                                                                                                                                                                 |
| Cone or cone-rod dystrophy, XL                   | <i>CACNA1F</i> , <u><i>RPGR</i></u>                                                                                                                                                                                                                                                                                                                                                                                                                                                                                                                        |
| Congenital stationary night blindness, AD        | <i>GNAT1</i> , <u><i>PDE6B</i></u> , <u><i>RHO</i></u>                                                                                                                                                                                                                                                                                                                                                                                                                                                                                                     |
| Congenital stationary night blindness, AR        | <i>CABP4</i> , <i>GRK1</i> , <i>GRM6</i> , <i>RDH5</i> , <i>SAG</i> , <i>SLC24A1</i> , <i>TRPM1</i>                                                                                                                                                                                                                                                                                                                                                                                                                                                        |
| Congenital stationary night blindness, XL        | <i>CACNA1F</i> , <i>NYX</i>                                                                                                                                                                                                                                                                                                                                                                                                                                                                                                                                |
| Deafness alone or syndromic, AD                  | <i>WFS1</i>                                                                                                                                                                                                                                                                                                                                                                                                                                                                                                                                                |
| Deafness alone or syndromic, AR                  | <i>CDH23</i> , <i>DFNB31</i> , <i>MYO7A</i> , <i>PCDH15</i> , <i>PDZD7</i> , <i>USH1C</i>                                                                                                                                                                                                                                                                                                                                                                                                                                                                  |
| Leber congenital amaurosis, AD                   | <i>CRX</i> , <i>IMPDH1</i> , <i>OTX2</i>                                                                                                                                                                                                                                                                                                                                                                                                                                                                                                                   |
| Leber congenital amaurosis, AR                   | <i>AIPL1</i> , <i>CABP4</i> , <i>CEP290</i> , <i>CRB1</i> , <i>CRX</i> , <i>GUCY2D</i> , <i>IQCB1</i> , <i>LCA5</i> , <i>LRAT</i> , <i>RD3</i> , <i>RDH12</i> , <u><i>RPE65</i></u> , <u><i>RPGRIP1</i></u> , <i>SPATA7</i> , <i>TULP1</i>                                                                                                                                                                                                                                                                                                                 |
| Macular degeneration, AD                         | <u><i>BEST1</i></u> , <i>C1QTNF5</i> , <i>EFEMP1</i> , <i>ELOVL4</i> , <i>FSCN2</i> , <i>GUCA1B</i> , <i>HMCN1</i> , <i>PROM1</i> , <i>PRPH2</i> , <i>RP1L1</i> , <i>TIMP3</i>                                                                                                                                                                                                                                                                                                                                                                             |
| Macular degeneration, AR                         | <i>ABCA4</i> , <i>CFH</i>                                                                                                                                                                                                                                                                                                                                                                                                                                                                                                                                  |
| Macular degeneration, XL                         | <u><i>RPGR</i></u>                                                                                                                                                                                                                                                                                                                                                                                                                                                                                                                                         |
| Ocular-retinal developmental disease, AD         | <i>VCAN</i>                                                                                                                                                                                                                                                                                                                                                                                                                                                                                                                                                |
| Optic atrophy, AD                                | <i>OPA1</i>                                                                                                                                                                                                                                                                                                                                                                                                                                                                                                                                                |
| Optic atrophy, AR                                | <i>TMEM126A</i>                                                                                                                                                                                                                                                                                                                                                                                                                                                                                                                                            |
| Optic atrophy, XL                                | <i>TIMM8A</i>                                                                                                                                                                                                                                                                                                                                                                                                                                                                                                                                              |
| Retinitis pigmentosa, AD                         | <u><i>BEST1</i></u> , <i>CA4</i> , <i>CRX</i> , <i>FSCN2</i> , <i>GUCA1B</i> , <i>IMPDH1</i> , <i>KLHL7</i> , <i>NR2E3</i> , <i>NRL</i> , <i>PRPF3</i> , <i>PRPF6</i> , <i>PRPF8</i> , <i>PRPF31</i> , <i>PRPH2</i> , <i>RDH12</i> , <u><i>RHO</i></u> , <i>ROM1</i> , <i>RP1</i> , <i>RP9</i> , <i>SEMA4A</i> , <i>SNRNP200</i> , <i>TOPORS</i>                                                                                                                                                                                                           |
| Retinitis pigmentosa, AR                         | <i>ABCA4</i> , <u><i>BEST1</i></u> , <i>C2ORF71</i> , <i>CERKL</i> , <i>CLRN1</i> , <i>CNGA1</i> , <i>CNGB1</i> , <i>CRB1</i> , <i>DHDDS</i> , <i>EYS</i> , <i>FAM161A</i> , <i>IDH3B</i> , <i>IMPG2</i> , <i>LRAT</i> , <i>MERTK</i> , <i>NR2E3</i> , <i>NRL</i> , <u><i>PDE6A</i></u> , <u><i>PDE6B</i></u> , <i>PDE6G</i> , <u><i>PRCD</i></u> , <i>PROM1</i> , <i>RBP3</i> , <i>RGR</i> , <u><i>RHO</i></u> , <i>RLBP1</i> , <i>RP1</i> , <u><i>RPE65</i></u> , <i>SAG</i> , <i>SPATA7</i> , <i>TTC8</i> , <i>TULP1</i> , <i>USH2A</i> , <i>ZNF513</i> |
| Retinitis pigmentosa, XL                         | <i>RP2</i> , <u><i>RPGR</i></u>                                                                                                                                                                                                                                                                                                                                                                                                                                                                                                                            |
| Syndromic/systemic diseases with retinopathy, AD | <i>ABCC6</i> , <i>ATXN7</i> , <i>COL11A1</i> , <i>COL2A1</i> , <i>JAG1</i> , <i>KCNJ13</i> , <i>PAX2</i> , <i>TREX1</i> , <i>VCAN</i>                                                                                                                                                                                                                                                                                                                                                                                                                      |
| Syndromic/systemic diseases with retinopathy, AR | <i>ABCC6</i> , <i>AHI1</i> , <i>ALMS1</i> , <i>CC2D2A</i> , <i>CEP290</i> , <i>CLN3</i> , <i>COL9A1</i> , <i>FLVCR1</i> , <i>INPP5E</i> , <i>INVS</i> , <i>IQCB1</i> , <i>LRP5</i> , <i>MKS1</i> , <i>MTTP</i> , <i>NPHP1</i> , <i>NPHP3</i> , <u><i>NPHP4</i></u> , <i>OPA3</i> , <i>PANK2</i> , <i>PEX1</i> , <i>PEX7</i> , <i>PHYH</i> , <i>PXMP3</i> , <i>RPGRIP1L</i> , <i>SDCCAG8</i> , <i>TTPA</i> , <i>WFS1</i>                                                                                                                                    |
| Syndromic/systemic diseases with retinopathy, XL | <i>OFD1</i> , <i>TIMM8A</i>                                                                                                                                                                                                                                                                                                                                                                                                                                                                                                                                |
| Usher syndrome, AR                               | <i>CDH23</i> , <i>CLRN1</i> , <i>DFNB31</i> , <i>GPR98</i> , <i>MYO7A</i> , <i>PCDH15</i> , <i>USH1C</i> , <i>USH1G</i> , <i>USH2A</i>                                                                                                                                                                                                                                                                                                                                                                                                                     |
| Other retinopathy, AD                            | <u><i>BEST1</i></u> , <i>CRB1</i> , <i>FZD4</i> , <i>LRP5</i> , <i>OPN1SW</i> , <i>RB1</i> , <i>TSPAN12</i>                                                                                                                                                                                                                                                                                                                                                                                                                                                |
| Other retinopathy, AR                            | <u><i>BEST1</i></u> , <i>CDH3</i> , <i>CNGA3</i> , <u><i>CNGB3</i></u> , <i>CNNM4</i> , <i>CYP4V2</i> , <i>GNAT2</i> , <i>LRP5</i> , <i>MFRP</i> , <i>NR2E3</i> , <i>OAT</i> , <i>PROM1</i> , <i>RBP4</i> , <i>RGS9</i> , <i>RGS9BP</i> , <i>RLBP1</i>                                                                                                                                                                                                                                                                                                     |
| Other retinopathy, mitochondrial                 | <i>KSS</i> , <i>LHON</i> , <i>MT-ATP6</i> , <i>MT-TH</i> , <i>MT-TL1</i> , <i>MT-TP</i> , <i>MT-TS2</i>                                                                                                                                                                                                                                                                                                                                                                                                                                                    |
| Other retinopathy, XL                            | <i>CACNA1F</i> , <i>CHM</i> , <i>DMD</i> , <i>NDP</i> , <i>OPN1LW</i> , <i>OPN1MW</i> , <i>PGK1</i> , <i>RS1</i>                                                                                                                                                                                                                                                                                                                                                                                                                                           |

**Supplementary Table 2. Age at diagnosis based on ERG, ophthalmoscopy, or clinical signs in selected breeds with retinal degeneration**

| Breed                          | Disease             | Age of diagnosis              |                                   |
|--------------------------------|---------------------|-------------------------------|-----------------------------------|
|                                |                     | ERG                           | Ophthalmoscopy<br>(Clinical sign) |
| Irish setter                   | rcd1                | 6 wks                         | 16 wks                            |
| Collie                         | rcd2                | 16 days                       | 6 ms                              |
| Norwegian elkhound             | erd                 | 6 wks                         | 6-8 ms                            |
| Norwegian elkhound             | rd                  | 6 wks                         | 1-1.5 yrs                         |
| Siberian husky, Samoyed        | XLPRA1              | 6-12 ms                       | 1.5-2 yrs                         |
| Mongrel                        | XLPRA2              | 6 wks                         | 2-3 yrs                           |
| English mastiff, Bullmastiff   | ADPRA               | 1-1.5 yrs                     | 6 ms-3 yrs                        |
| Poodle (toy, miniature)        | prcd                | 1.5 yrs                       | 3-5 yrs                           |
| American cocker spaniel        | prcd                | 1.5 yrs                       | 3-5 yrs                           |
| Portuguese water dog           | prcd                | 1.5 yrs                       | 3-5 yrs                           |
| Labrador retriever             | prcd                | 1.5 yrs                       | 4-6 yrs                           |
| English cocker spaniel         | prcd                | >2.5 yrs                      | 8-12 yrs                          |
| Golden retriever               | GR_PRA1             | -                             | 4-7 yrs                           |
| American Staffordshire terrier | crd1                | <8 wks                        | 3-6 ms                            |
| American pit bull terrier      | crd2                | <8 wks                        | 3-6 ms                            |
| Glen of Imaal                  | crd3                | 1.2 yrs                       | 3-5 yrs                           |
| Miniature longhaired dachshund | cord1 (crd4)        | 6 wks (cone)<br>/14 wks (rod) | 6 ms                              |
| Standard wirehaired dachshund  | CRD <sup>SWHD</sup> | 5 wks (cone)                  | 10 ms-3 yrs                       |
| Schapendoes                    | gPRA <sup>SPD</sup> | -                             | 2-5 yrs                           |
| Golden retriever               | prcd                | -                             | 5-6 yrs                           |
| Alaskan malamute               | cd <sup>AMAL</sup>  | 6-12 wks                      | (8-12 wks)                        |
